# Supplementary material for: Nutrition and Sensory Evaluation of Solid-State Fermented Brown Rice Based on Cluster and Principal Component Analysis
Source: MDPI journal article supplement (doi:10.3390/foods11111560), 2022-05-25
Supplement: s1 [file s1]

Supplementary

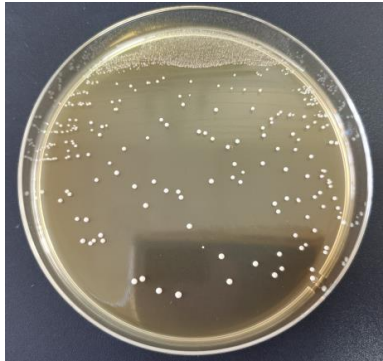

*L. plantarum*

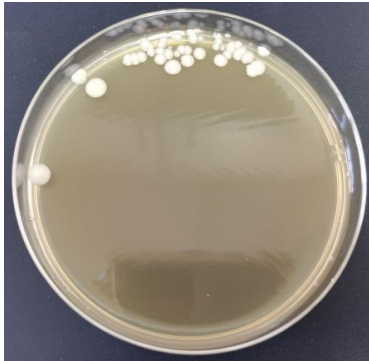

*S. cerevisiae*

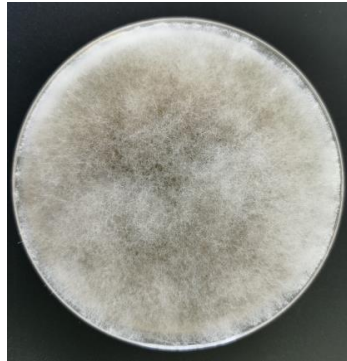

*R. oryzae*

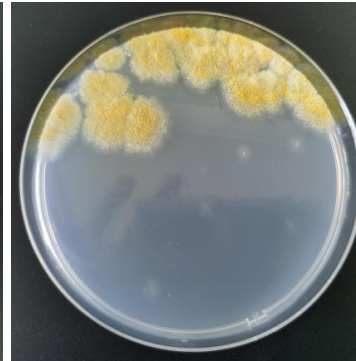

*A. oryzae*

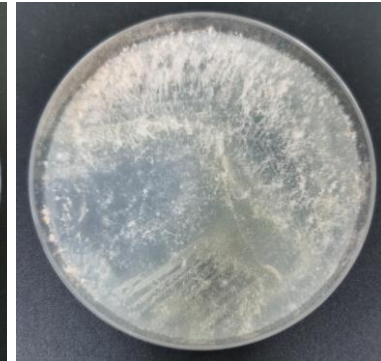

*N. sitophila*

Figure S1. The growth state of the five strains.

**Table S1.** Criteria for sensory scoring.

| Primary Index                        | Assessment Indicator<br>Secondary Index       | Criteria                                                                                             | Range |
|--------------------------------------|-----------------------------------------------|------------------------------------------------------------------------------------------------------|-------|
| Smell (20 points)                    | Purity                                        | Delicate rice smell with strong unique fermented savory smell, no odor distribution                  | 15~20 |
|                                      |                                               | Apparent rice smell with in-apparent unique fermented savory smell, no odor distribution             | 12~14 |
|                                      |                                               | Medium rice smell without unique fermented savory smell, with certain peculiar smell                 | 7~11  |
|                                      |                                               | Obvious peculiar smell                                                                               | 0~6   |
| Appearance (20 points)               | Color (10 points)                             | Light yellow or white with bright color                                                              | 7~10  |
|                                      |                                               | Light yellow with general luster                                                                     | 4~6   |
|                                      |                                               | Dark yellow and dark in color                                                                        | 0~3   |
|                                      | Degree of whiteness (10 points)               | Large cracking with high whiteness                                                                   | 7~10  |
|                                      |                                               | Little cracking with slight whiteness                                                                | 4~6   |
|                                      |                                               | No cracking without no whiteness                                                                     | 0~3   |
| Taste (20 points)                    | Fragrance (10 points)                         | Strong fragrance without peculiar smell when chewing                                                 | 9~10  |
|                                      |                                               | Faint fragrance without peculiar smell when chewing                                                  | 6~8   |
|                                      |                                               | No fragrance and peculiar smell when chewing                                                         | 4~6   |
|                                      |                                               | No fragrance with obvious peculiar smell when chewing                                                | 0~3   |
|                                      | Taste produced by fermentation<br>(10 points) | Obvious nice and unique sour taste featured of fermentation when chewing, no strange taste           | 9~10  |
|                                      |                                               | Weak in unique sour taste featured of fermentation when chewing, no strange taste                    | 6~8   |
|                                      |                                               | No obvious unique sour taste featured of fermentation when chewing, no uncomfortable taste           | 4~6   |
|                                      |                                               | No obvious unique sour taste featured of fermentation when chewing, with obvious uncomfortable taste | 0~3   |
| Overall acceptability<br>(30 points) | Viscosity or stickiness (10 points)           | Clingy but not sticky                                                                                | 8~10  |
|                                      |                                               | Less clingy but not stick to teeth                                                                   | 5~7   |
|                                      |                                               | Stick to teeth or without viscosity                                                                  | 0~4   |
|                                      | Elasticity or resilience (10 points)          | Muscular and chewy                                                                                   | 8~10  |
|                                      |                                               | Slight muscular and chewy                                                                            | 5~7   |
|                                      |                                               | No muscular and chewy                                                                                | 0~4   |
|                                      | Hardness (10 points)                          | Moderate in hardness and softness                                                                    | 8~10  |
|                                      |                                               | Inclined to hard or soft                                                                             | 5~7   |
|                                      |                                               | Very hard or soft                                                                                    | 0~4   |
| Texture (10 points)                  | Compactness and cohesiveness<br>(10 points)   | Fluffy, uniform dispersed, without agglomeration                                                     | 7~10  |
|                                      |                                               | Less fluffy, slight agglomerate                                                                      | 4~6   |
|                                      |                                               | Easy to bond together                                                                                | 0~3   |
